# Supplementary material for: Outcome Measures and Biomarkers for Clinical Trials in Hereditary Spastic Paraplegia: A Scoping Review
Source: MDPI journal article supplement (doi:10.3390/genes14091756), 2023-09-03
Supplement: s1 [file s1]

| Outcome measure/<br>Biomarker | Study                | Classify patients vs controls |         | Indicate disease progression |                              | Response to intervention |         | Correlation with other biomarker/outcome measure |                         |
|-------------------------------|----------------------|-------------------------------|---------|------------------------------|------------------------------|--------------------------|---------|--------------------------------------------------|-------------------------|
|                               |                      | Controls included             | Outcome | Longitudinal study           | Outcome                      | Intervention             | Outcome | Biomarker                                        | Significant correlation |
| CROMs – HSP specific          |                      |                               |         |                              |                              |                          |         |                                                  |                         |
| SPRS                          | Ardolino 2021        | No                            | N/A     | No                           | N/A                          | Yes                      | No      | No                                               | N/A                     |
|                               | Brighente 2021       | Yes                           | N/A     | No                           | N/A                          | No                       | N/A     | MEP amp or CMCT                                  | No                      |
|                               | Chrestian 2016       | No                            | N/A     | No                           | N/A                          | No                       | N/A     | Brain MRI                                        | Yes                     |
|                               | Cubillos-Arcila 2022 | Yes                           | N/A     | Yes                          | Yes (but only in SPG4 group) | No                       | N/A     | 10MWT 6MWT and TUG                               | Yes<br>No               |
|                               | deLima 2021          | No                            | N/A     | No                           | N/A                          | Yes                      | No      | No                                               | N/A                     |
|                               | DelaCasa-Fages 2019  | No                            | N/A     | No                           | No – descriptive paper       | No                       | N/A     | No                                               | N/A                     |
|                               | Faber 2018           | Yes                           | N/A     | Yes                          | Yes                          | No                       | N/A     | Disease duration MRI measures                    | Yes                     |
|                               | Gassner 2021         | No                            | N/A     | No                           | N/A                          | No                       | N/A     | SF-12 PCS only, 10MWT, 2MWT, TUG.                | Yes.                    |
|                               | Jordan 2021          | No                            | N/A     | No                           | N/A                          | No                       | N/A     | CPCHILD                                          | Yes                     |
|                               | Karle 2013           | No                            | N/A     | No                           | N/A                          | No                       | N/A     | CMCT to the legs and arms.                       | Yes                     |
|                               | Kessler 2022         | Yes                           | N/A     | Yes                          | Yes (3/31 patients)          | No                       | N/A     | Serum Nfl                                        | No                      |
|                               | Klimpe 2012          | No                            | N/A     | No                           | N/A                          | No                       | N/A     | SF-36                                            | Yes                     |

|  |                       |     |     |     |                                            |     |     |                                                                                 |                             |
|--|-----------------------|-----|-----|-----|--------------------------------------------|-----|-----|---------------------------------------------------------------------------------|-----------------------------|
|  | Lassman 2022          | Yes | Yes | No  | N/A                                        | No  | N/A | Gait analysis                                                                   | Yes                         |
|  | Lin 2021              | Yes | N/A | No  | N/A                                        | No  | N/A | CSF 27-OHC<br>CSF NfL                                                           | No                          |
|  | Martinuzzi<br>2016    | No  | N/A | No  | N/A                                        | No  | N/A | Age at onset<br>and disease<br>duration.<br>ENB2.<br>FIM<br>DTI - FA and<br>MD. | Yes                         |
|  | Montanaro<br>2020     | Yes | N/A | Yes | No                                         | No  | N/A | VBM and DTI<br>indices                                                          | No                          |
|  | Musacchio<br>2018     | No  | N/A | Yes | Yes                                        | No  | N/A | No                                                                              | N/A                         |
|  | Navas-Sanchez<br>2021 | Yes | N/A | No  | N/A                                        | No  | N/A | Age<br>B/L thalamus<br>volume                                                   | Yes                         |
|  | Orsucci 2014          | No  | N/A | No  | N/A                                        | No  | N/A | Age of onset.<br>Age at last<br>evaluation.<br>SF36 score.                      | No (age)<br><br>Yes (SF-36) |
|  | Paparella 2020        | No  | N/A | No  | N/A                                        | Yes | Yes | No                                                                              | N/A                         |
|  | Prestsaeter<br>2020   | No  | N/A | No  | N/A                                        | No  | N/A | No                                                                              | N/A                         |
|  | Rattay 2022           | Yes | Yes | No  | N/A                                        | No  | N/A | CSF NfL                                                                         | Yes                         |
|  | Regensburger<br>2022  | Yes | N/A | Yes | Yes (but only<br>in patients<br>with cHSP) | No  | N/A | Mobile gait<br>analysis<br>parameters                                           | Yes (weak)                  |
|  | Rezende 2015          | Yes | N/A | No  | N/A                                        | No  | N/A | DTI indices                                                                     | Yes (for TBSS<br>but not    |

|                                     |                      |     |     |     |                     |     |     |                                                        |                        |
|-------------------------------------|----------------------|-----|-----|-----|---------------------|-----|-----|--------------------------------------------------------|------------------------|
|                                     |                      |     |     |     |                     |     |     |                                                        | tractography )         |
|                                     | Schols 2017          | No  | N/A | Yes | Yes                 | Yes | No  | 10MWT<br>Time to climb 10 steps<br>Serum 27-OHC        | Yes                    |
|                                     | Vavla 2019           | No  | N/A | Yes | N/A                 | No  | N/A | RNFL thickness                                         | No                     |
|                                     | Wilke 2018           | Yes | N/A | No  | N/A                 | No  | N/A | Serum Nfl                                              | Yes                    |
| SPATAX-EUROSPA disability score     | Chrestian 2016       | No  | N/A | No  | No                  | No  | N/A | No                                                     | N/A                    |
|                                     | Dela-Casa Fages 2019 | No  | N/A | No  | N/A                 | No  | N/A | Variant type mtDNA                                     | Yes<br>No              |
|                                     | Kessler 2022         | Yes | N/A | Yes | Yes (3/31 patients) | No  | N/A | Serum Nfl                                              | No                     |
|                                     | Scheuer 2007         | No  | N/A | No  | N/A                 | Yes | No  | No                                                     | N/A                    |
| <b>CROMs – other conditions</b>     |                      |     |     |     |                     |     |     |                                                        |                        |
| SARA                                | Dela Casa Fages 2019 | No  | N/A | No  | N/A                 | No  | N/A | No                                                     | N/A                    |
|                                     | Du Montcel 2008      | Yes | Yes | No  | N/A                 | No  | N/A | No                                                     | N/A                    |
|                                     | Du Montcel 2012      | No  | N/A | Yes | Yes                 | No  | N/A | AMBUS                                                  | Yes                    |
| ALS rating scale revised (ALSFRS-R) | Simonini 2021        | No  | N/A | Yes | No                  | No  | N/A | Serum and CSF crt-pNfH (for whole group including ALS) | Yes                    |
|                                     | Zucchi 2018          | Yes | N/A | Yes | Yes                 | No  | N/A | CSF and Serum pNfH                                     | Yes (with progression) |

|                                                   |                 |     |     |     |     |     |                           |                                                |                                                |
|---------------------------------------------------|-----------------|-----|-----|-----|-----|-----|---------------------------|------------------------------------------------|------------------------------------------------|
|                                                   |                 |     |     |     |     |     |                           |                                                | rate and total score)                          |
| Unified Huntington's Disease Rating Scale Part IV | Du Montcel 2008 | Yes | N/A | No  | N/A | No  | N/A                       | CCFS                                           | Yes                                            |
| MS Impairment Scale                               | Scheuer 2007    | No  | N/A | No  | N/A | Yes | No                        | No                                             | N/A                                            |
| <b>CROMs – Generic functional</b>                 |                 |     |     |     |     |     |                           |                                                |                                                |
| Functional questionnaire score                    | Henderson 2019  | No  | N/A | No  | N/A | Yes | No                        | No                                             | N/A                                            |
| Modified Rankin Scale                             | Zucchi 2018     | Yes | N/A | Yes | N/A | No  | N/A                       | Serum and CSF pNfH (whole group including ALS) | Yes (at last observation but not at diagnosis) |
| Disability Score (DIS)                            | Scheuer 2007    | No  | N/A | No  | N/A | Yes | No                        | No                                             | N/A                                            |
| Functional Independence Measure (FIM)             | Martinuzzi 2016 | No  | N/A | No  | N/A | No  | N/A                       | SPRS                                           | Yes                                            |
| <b>PerfOMs – motor function</b>                   |                 |     |     |     |     |     |                           |                                                |                                                |
| Modified Ashworth Scale                           | Antczak 2019,   | No  | N/A | No  | N/A | Yes | Yes (proximal not distal) | No                                             | N/A                                            |
|                                                   | Ardolino 2021   | No  | N/A | No  | N/A | Yes | Yes                       | No                                             | N/A                                            |
|                                                   | Bastani 2021    | No  | N/A | No  | N/A | Yes | Yes                       | No                                             | N/A                                            |
|                                                   | Bertolucci 2015 | No  | N/A | No  | N/A | Yes | No                        | No                                             | N/A                                            |

|  |                   |     |     |     |                                                                             |     |                                           |                                                  |     |
|--|-------------------|-----|-----|-----|-----------------------------------------------------------------------------|-----|-------------------------------------------|--------------------------------------------------|-----|
|  | Braschinsky 2009, | No  | N/A | No  | N/A                                                                         | No  | N/A                                       | Active ROM (goniometer)<br>Walking speed (10MWT) | Yes |
|  | deLima 2021       | No  | N/A | No  | N/A                                                                         | Yes | Yes (hip adductors)<br>No (triceps surae) | No                                               | N/A |
|  | Geva-Dayan 2010   | No  | N/A | No  | N/A                                                                         | Yes | Yes                                       | No                                               | N/A |
|  | Kai 2014          | No  | N/A | Yes | Yes (immediately after treatment <12 months but not long term 12-24 months) | Yes | Yes                                       | No                                               | N/A |
|  | Lith 2019         | No  | N/A | No  | N/A                                                                         | Yes | Yes                                       | No                                               | N/A |
|  | Loureiro 2013     | No  | N/A | No  | N/A                                                                         | No  | N/A                                       | No                                               | N/A |
|  | Margetis 2014     | No  | N/A | No  | N/A                                                                         | Yes | Yes                                       | No                                               | N/A |
|  | Martinuzzi 2016   | No  | N/A | No  | N/A                                                                         | No  | N/A                                       | No                                               | N/A |
|  | Paparella 2020    | No  | N/A | No  | N/A                                                                         | Yes | Yes                                       | No                                               | N/A |
|  | Pointon 2022      | No  | N/A | No  | N/A                                                                         | Yes | Yes                                       | No                                               | N/A |
|  | Simonini 2021     | No  | N/A | Yes | N/A                                                                         | No  | N/A                                       | No                                               | N/A |
|  | Uygunoglo 2016    | No  | N/A | No  | N/A                                                                         | Yes | Yes                                       | No                                               | N/A |
|  | Zhang 2014        | Yes | N/A | No  | N/A                                                                         | Yes | N/A (not used as                          | No                                               | N/A |

|                                                                                                               |                         |     |     |     |                                                     |     |                     |                                                                              |                                     |
|---------------------------------------------------------------------------------------------------------------|-------------------------|-----|-----|-----|-----------------------------------------------------|-----|---------------------|------------------------------------------------------------------------------|-------------------------------------|
|                                                                                                               |                         |     |     |     |                                                     |     | outcome<br>measure) |                                                                              |                                     |
|                                                                                                               | Zucchi 2018,            | Yes | N/A | Yes | No                                                  | No  | N/A                 | Serum and<br>CSF pNfH                                                        | Yes                                 |
| 10m walk<br>time<br>(10MWT), 6<br>MWT, 2 min<br>WT, 5 min<br>WT, 3-min<br>endurance<br>walk, 20m<br>walk time | Antczak 2019,           | No  | N/A | No  | N/A                                                 | Yes | No                  | No                                                                           | N/A                                 |
|                                                                                                               | Ardolino 2021           | No  | N/A | No  | N/A                                                 | Yes | No                  | No                                                                           | N/A                                 |
|                                                                                                               | Bastani 2021            | No  | N/A | No  | N/A                                                 | Yes | No                  | No                                                                           | N/A                                 |
|                                                                                                               | Bertolucci<br>2015      | No  | N/A | No  | N/A                                                 | Yes | Yes                 | No                                                                           | N/A                                 |
|                                                                                                               | Braschinsky<br>2009     | No  | N/A | No  | N/A                                                 | No  | N/A                 | Active ROM<br>as measured<br>with<br>Goniometer<br>(hip<br>abduction)<br>MAS | Yes                                 |
|                                                                                                               | Cubillos-Arcila<br>2022 | Yes | Yes | Yes | Yes (for max<br>but not self-<br>selected<br>speed) | No  | N/A                 | SPRS                                                                         | Yes for<br>10MWT but<br>no for 6MWT |
|                                                                                                               | deLima 2021             | No  | N/A | No  | N/A                                                 | Yes | No                  | No                                                                           | N/A                                 |
|                                                                                                               | Gassner 2021            | Yes | Yes | No  | N/A                                                 | No  | N/A                 | FES-I, SPRS,<br>TUG, SF-12<br>(PCS only)                                     | Yes                                 |
|                                                                                                               | Lith 2019               | No  | N/A | No  | N/A                                                 | Yes | No                  | No                                                                           | N/A                                 |
|                                                                                                               | Martinuzzi<br>2016      | No  | N/A | No  | N/A                                                 | No  | N/A                 | No                                                                           | N/A                                 |
|                                                                                                               | Paparella 2020          | No  | N/A | No  | N/A                                                 | Yes | Yes                 | No                                                                           | N/A                                 |
|                                                                                                               | Pointon 2022            | No  | N/A | No  | N/A                                                 | Yes | No                  | No                                                                           | N/A                                 |
|                                                                                                               | Rattay 2022             | Yes | No  | No  | N/A                                                 | No  | N/A                 | No                                                                           | N/A                                 |
|                                                                                                               | Uygunoglu<br>2016       | No  | N/A | No  | N/A                                                 | Yes | Yes                 | No                                                                           | N/A                                 |

|                                                   |                      |     |     |     |                                         |     |                                       |                                   |                  |
|---------------------------------------------------|----------------------|-----|-----|-----|-----------------------------------------|-----|---------------------------------------|-----------------------------------|------------------|
| Timed Up and Go test (TUG)                        | Antczak 2019         | No  | N/A | No  | N/A                                     | Yes | No                                    | No                                | N/A              |
|                                                   | Bertolucci 2015      | No  | N/A | No  | N/A                                     | Yes | No (close to significance)            | No                                | N/A              |
|                                                   | Cubillos-Arcila 2022 | Yes | Yes | Yes | Yes for max but not self selected speed | No  | N/A                                   | SPRS                              | No               |
|                                                   | Gassner 2021         | Yes | Yes | No  | N/A                                     | No  | N/A                                   | FES-I<br>SPRS<br>SF-12            | Yes<br>Yes<br>No |
|                                                   | Lith 2019            | No  | N/A | No  | N/A                                     | Yes | No                                    | No                                | N/A              |
|                                                   | Paparella 2020       | No  | N/A | No  | N/A                                     | Yes | Yes                                   | No                                | N/A              |
|                                                   | Regensburger 2022    | Yes | N/A | Yes | Yes (for cHSP)                          | No  | N/A                                   | No                                | N/A              |
| MRC muscle strength                               | deLima 2021          | No  | N/A | No  | N/A                                     | Yes | No                                    | No                                | N/A              |
|                                                   | Lith 2019            | No  | N/A | No  | N/A                                     | Yes | Yes (Hip adductors but not abductors) | No                                | N/A              |
|                                                   | Loureiro 2013        | No  | N/A | No  | N/A                                     | No  | N/A                                   | No                                | N/A              |
|                                                   | Martinuzzi 2016      | No  | N/A | No  | N/A                                     | No  | N/A                                   | No                                | N/A              |
| Gross motor function measure (GMFM-66 or GMFM-88) | Geva-Dayana 2010     | No  | N/A | No  | N/A                                     | Yes | Yes                                   | No                                | N/A              |
|                                                   | Pointon 2022         | No  | N/A | No  | N/A                                     | Yes | No                                    | No                                | N/A              |
| Gross motor function classification score (GMFCS) | Mishra 2015          | Yes | N/A | No  | N/A                                     | No  | N/A                                   | TSFA (DTI) in corticospinal tract | Yes              |
|                                                   | Pointon 2022         | No  | N/A | No  | N/A                                     | Yes | No                                    | No                                | N/A              |

|                                                                                             |                   |     |     |     |     |     |                                    |                                          |                                           |
|---------------------------------------------------------------------------------------------|-------------------|-----|-----|-----|-----|-----|------------------------------------|------------------------------------------|-------------------------------------------|
| Falls Efficacy Scale-International (FES-I)                                                  | Gassner 2021      | Yes | Yes | No  | N/A | No  | N/A                                | SPRS 10MWT, 2MWT, TUG SF-12              | Yes. No for total SF-12 (but yes for PCS) |
|                                                                                             | Regensburger 2022 | Yes | N/A | Yes | N/A | No  | N/A                                | Gait parameters (stride and stance time) | Yes                                       |
| Berg balance scale                                                                          | Bertolucci 2015   | No  | N/A | No  | N/A | Yes | Yes                                | No                                       | N/A                                       |
|                                                                                             | Lith 2019         | No  | N/A | No  | N/A | Yes | No                                 | No                                       | N/A                                       |
| Composite cerebellar functional severity score (CCFSw)                                      | Du Montcel 2008   | Yes | Yes | No  | N/A | No  | N/A                                | UHDRS-IV VAS (EQ5D)                      | Yes                                       |
|                                                                                             | Du Montcel 2012   | No  | N/A | Yes | No  | No  | N/A                                | AMBUS                                    | Yes                                       |
| Nine hole pegboard test, click test, writing test, tapping test                             | DuMontcel 2008    | Yes | No  | No  | N/A | No  | N/A                                | No                                       | N/A                                       |
|                                                                                             | Uygunoglu 2016    | No  | N/A | No  | N/A | Yes | Yes (left hand)<br>No (right hand) | No                                       | N/A                                       |
| Physiological Cost Index (increase in HR per metre walked, estimate of oxygen consumption ) | Bertolucci 2015   | No  | N/A | No  | N/A | Yes | No                                 | No                                       | N/A                                       |
|                                                                                             | Schols 2017       | Yes | N/A | Yes | N/A | Yes | No                                 | No                                       | N/A                                       |



|                                                                  |                |    |     |     |     |     |     |             |     |
|------------------------------------------------------------------|----------------|----|-----|-----|-----|-----|-----|-------------|-----|
| Four-stage functional scale of motor disability (4SMD or 4FMS)   | Orsucci 2014   | No | N/A | No  | N/A | No  | N/A | SPRS, SF-36 | Yes |
|                                                                  | Jordan 2021    | No | N/A | No  | N/A | No  | N/A | CPCHILD     | Yes |
| Activities specific Balance Confidence scale (ABC)               | Lith 2019      | No | N/A | No  | N/A | Yes | No  | No          | N/A |
| Modified version of Gillette Functional Assessment Questionnaire | Margetis 2014  | No | N/A | No  | N/A | Yes | Yes | No          | N/A |
| Walking Handicap scale                                           | Paparella 2020 | No | N/A | No  | N/A | Yes | Yes | No          | N/A |
| Lower extremity subclass of Fugl-Meyer assessment                | Bastani 2021   | No | N/A | No  | N/A | Yes | No  | No          | N/A |
| Ambulatory score (AMB)                                           | Scheuer 2007   | No | N/A | No  | N/A | Yes | No  | No          | N/A |
| AMBUS (distance in metres walked in 5                            | DuMontcel 2012 | No | N/A | Yes | N/A | No  | N/A | SARA CCFSw  | Yes |

|                                                |                   |     |     |     |               |     |     |                                              |                                                           |
|------------------------------------------------|-------------------|-----|-----|-----|---------------|-----|-----|----------------------------------------------|-----------------------------------------------------------|
| sec without help)                              |                   |     |     |     |               |     |     |                                              |                                                           |
| Spasm frequency Scale                          | Kai 2014          | No  | N/A | Yes | Yes (post Rx) | Yes | Yes | No                                           | N/A                                                       |
| Strength with microFET 2 hand-held dynamometer | Antczak 2019      | No  | N/A | No  | N/A           | Yes | Yes | No                                           | N/A                                                       |
| Walking ability (landmarks of disability)      | Klimpe 2012       | No  | N/A | No  | N/A           | No  | N/A | SF-36                                        | Yes                                                       |
| <b>PerfOMs – Cognition</b>                     |                   |     |     |     |               |     |     |                                              |                                                           |
| Montreal Cognitive Assessment (MoCA)           | Gassner 2021      | Yes | N/A | No  | N/A           | No  | N/A | No                                           | N/A                                                       |
|                                                | Rattay 2022       | Yes | No  | No  | N/A           | No  | N/A | No                                           | N/A                                                       |
|                                                | Rattay 2019       | Yes | No  | No  | N/A           | No  | N/A | SPRS                                         | No                                                        |
|                                                | Regensburger 2022 | Yes | N/A | Yes | N/A           | No  | N/A | Gait stride parameters                       | Yes for coefficient of variation but not absolute values. |
| WAIS-R                                         | Erichsen 2009     | Yes | No  | No  | N/A           | No  | N/A | CVLT-T (multiple neuropsych tests performed) | Yes                                                       |
|                                                | Musacchio 2018    | No  | N/A | Yes | Yes           | No  | N/A | No                                           | N/A                                                       |
|                                                | Martinuzzi 2016   | No  | N/A | No  | N/A           | No  | N/A | No                                           | N/A                                                       |

|                                                     |                    |                                   |     |     |     |     |     |                               |                                  |
|-----------------------------------------------------|--------------------|-----------------------------------|-----|-----|-----|-----|-----|-------------------------------|----------------------------------|
| MMSE                                                | Navas-Sanchez 2021 | Yes                               | N/A | No  | N/A | No  | N/A | No                            | N/A                              |
|                                                     | Lin 2021           | Yes                               | N/A | No  | N/A | No  | N/A | CSF 27OHC, MMSE               | No                               |
| Addenbrooke's Cognitive Examination Revised (ACE-R) | Faber 2018         | Yes                               | N/A | Yes | N/A | No  | N/A | SPRS                          | Yes                              |
| CANTAB Cognitive Assessment Software                | Rattay 2019        | Yes                               | No  | No  | N/A | No  | N/A | No                            | N/A                              |
| VLMT, FWIT, TMT A/B, FAB, d2-R, RWT                 | Musacchio 2018     | No                                | N/A | Yes | Yes | No  | N/A | No                            | N/A                              |
| <b>PROMs – Quality of life</b>                      |                    |                                   |     |     |     |     |     |                               |                                  |
| SF-36, SF-12, RAND 36-Item Health Survey            | Bastani 2021       | No                                | N/A | No  | N/A | Yes | No  | No                            | N/A                              |
|                                                     | Bertolucci 2015    | No                                | N/A | No  | N/A | Yes | Yes | No                            | N/A                              |
|                                                     | Braschinsky 2011   | Yes (previously published values) | Yes | No  | N/A | No  | N/A | No                            | N/A                              |
|                                                     | Gassner 2021       | Yes                               | Yes | No  | N/A | No  | N/A | FES-I, SPRS TUG, 10MWT, MWT   | Yes<br>Yes for PCS but not total |
|                                                     | Klimpe 2012        | No                                | N/A | No  | N/A | No  | N/A | SPRS, Landmarks of disability | Yes                              |
|                                                     | Orsucci 2014       | No                                | N/A | No  | N/A | No  | N/A | 4SMD, SPRS                    | Yes                              |

|                                          |                   |     |               |     |     |     |                              |                                       |                 |
|------------------------------------------|-------------------|-----|---------------|-----|-----|-----|------------------------------|---------------------------------------|-----------------|
|                                          | Regensburger 2022 | Yes | N/A           | Yes | N/A | No  | N/A                          | Gait parameters                       | Yes for PCS     |
| EQ-5D                                    | DuMontcel 2008    | Yes | N/A           | No  | N/A | No  | N/A                          | CCFS                                  | Yes             |
|                                          | Rattay 2019       | Yes | Yes           | No  | N/A | No  | N/A                          | Maximum gait distance<br>BPI<br>BDI-V | Yes<br>No (RLS) |
|                                          | Rattay 2022       | Yes | No (pre SPG4) | No  | N/A | No  | N/A                          | No                                    | N/A             |
| Becks Depression Inventory (BDI-V)       | Rattay 2022       | Yes | No (pre SPG4) | No  | N/A | No  | N/A                          | No                                    | N/A             |
|                                          | Rattay 2019       | Yes | Yes           | No  | N/A | No  | N/A                          | EQ5D                                  | Yes             |
| Visual analogue score (for QoL)          | Paparella 2020    | No  | N/A           | No  | N/A | Yes | Yes                          | No                                    | N/A             |
|                                          | Scheuer 2007      | No  | N/A           | No  | N/A | Yes | No                           | No                                    | N/A             |
| Patient Health Questionnaire (PHQ-9)     | DuMontcel 2008    | Yes | N/A           | No  | N/A | No  | N/A                          | No                                    | N/A             |
| Modified Goal Attainment Scale (mGAS)    | Pointon 2022      | No  | N/A           | No  | N/A | Yes | Yes                          | No                                    | N/A             |
| ICIQ-LUTSqol                             | Schneider 2019    | No  | N/A           | No  | N/A | No  | N/A                          | ICIQ-SF, SCOPA-AUT                    | Yes             |
| Cerebral Palsy QoL questionnaire (CPQoL) | Pointon 2022      | No  | N/A           | No  | N/A | Yes | Improved in 2/5 participants | No                                    | N/A             |

|                                              |                 |     |                 |     |     |     |     |              |        |
|----------------------------------------------|-----------------|-----|-----------------|-----|-----|-----|-----|--------------|--------|
| CPCHILD questionnaire                        | Jordan 2021     | No  | N/A             | No  | N/A | No  | N/A | 4FMS         | Yes    |
| ZUNG depression score                        | Gassner 2021    | Yes | Yes             | No  | N/A | No  | N/A | No           | N/A    |
| ICIQ-SF                                      | Schneider 2019  | No  | N/A             | No  | N/A | No  | N/A | ICIQ-LUTSqoL | Yes    |
| Hospital Anxiety and Depression Scale (HADS) | Bertolucci 2015 | No  | N/A             | No  | N/A | Yes | Yes | No           | N/A    |
| <b>PROMs – Other</b>                         |                 |     |                 |     |     |     |     |              |        |
| Brief pain inventory                         | deLima 2021     | No  | N/A             | No  | N/A | Yes | No  | No           | N/A    |
|                                              | Rattay 2019     | Yes | Yes             | No  | N/A | No  | N/A | EQ5D         | Yes    |
|                                              | Rattay 2022     | Yes | No              | No  | N/A | No  | N/A | No           | N/A    |
| Modified Fatigue Impact Scale (MFI)          | deLima 2021     | No  | N/A             | No  | N/A | Yes | No  | No           | N/A    |
|                                              | Rattay 2019     | Yes | Yes             | No  | N/A | No  | N/A | EQ5D         | Yes    |
| Multidimensional fatigue inventory           | Rattay 2022     | Yes | No              | No  | N/A | No  | N/A | No           | N/A    |
| SCOPA-AUT                                    | Schneider 2019  | No  | N/A             | No  | N/A | No  | N/A | ICIQ-LUTSqoL | Yes    |
| Numeric rating scale for pain                | Paparella 2020  | No  | N/A             | No  | N/A | Yes | Yes | No           | N/A    |
| <b>Biochemical/Lab studies</b>               |                 |     |                 |     |     |     |     |              |        |
| Serum and CSF neurofilament light chain      | Kessler 2021    | Yes | Yes (CSF NfL)   | No  | N/A | No  | N/A | Age Gender   | Yes    |
|                                              | Kessler 2022    | Yes | Yes (Serum NfL) | Yes | No  | No  | N/A | Age SPRS     | Yes No |

|                                                   |                  |                                           |                                                                                   |     |     |     |                                         |                                             |                                 |
|---------------------------------------------------|------------------|-------------------------------------------|-----------------------------------------------------------------------------------|-----|-----|-----|-----------------------------------------|---------------------------------------------|---------------------------------|
|                                                   | Lassmann 2022    | Yes                                       | Yes                                                                               | No  | N/A | No  | N/A                                     | Gait parameter (foot angle and RoM)         | Yes (serum NfL)<br>No (CSF NfL) |
|                                                   | Lin 2021         | No (historical controls)                  | N/A (Yes compared to historical controls)                                         | No  | N/A | No  | N/A                                     | Spinal cord area, SPRS, MMSE<br>CSF 27-OHC  | No<br><br>Yes (27-OHC)          |
|                                                   | Rattay 2022      | Yes                                       | Serum - Yes for symptomatic SPG4, No for presymptomatic SPG4<br>CSF- yes for both | No  | N/A | No  | N/A                                     | SPRS                                        | Yes (CSF NfL)                   |
|                                                   | Wilke 2018       | Yes                                       | Yes                                                                               | No  | N/A | No  | N/A                                     | Disease progression (SPRS/disease duration) | Yes                             |
| Serum and CSF 24-OHC, 25-OHC and 27-OHC and 3b-CA | Lin 2021         | No (previously reported healthy controls) | N/A (Yes compared to prev HC)                                                     | No  | N/A | No  | N/A                                     | Spinal cord area, SPRS, MMSE<br>CSF NfL     | No<br><br>Yes (NfL)             |
|                                                   | Prestsaeter 2020 | No (reference range used)                 | N/A (Yes compared to reference range)                                             | No  | N/A | No  | N/A                                     | No                                          | N/A                             |
|                                                   | Schols 2017      | Yes                                       | Yes for all except 24-OHC                                                         | Yes | N/A | Yes | Yes for serum 27-OHC, 25-OHC and 24 OHC | SPRS                                        | Yes for 27-OHC only             |

|                                          |                |                                           |                                                   |     |     |     |                                                |                                                             |     |
|------------------------------------------|----------------|-------------------------------------------|---------------------------------------------------|-----|-----|-----|------------------------------------------------|-------------------------------------------------------------|-----|
|                                          |                |                                           |                                                   |     |     |     | (No for CSF or 3b-CA)                          |                                                             |     |
|                                          | Marelli 2018   | Yes                                       | Yes (plasma 27-OHC and 25-OHC)<br>No (24S-OHC)    | Yes | No  | Yes | Yes (plasma 27-OHC and 24S-OHC)<br>No (25-OHC) | No                                                          | N/A |
| Blood(plasma) and CSF amino acids        | Coutelier 2015 | Yes (historical controls)                 | Yes (ornithine, citrulline, arginine, proline)    | No  | N/A | No  | N/A                                            | No                                                          | N/A |
|                                          | Growdon 1991   | No                                        | N/A                                               | No  | N/A | Yes | No (plasma and CSF glycine)                    | No                                                          | N/A |
|                                          | Marelli 2020   | No                                        | N/A<br>Low citrulline compared to reference value | No  | N/A | No  | N/A                                            | No                                                          | N/A |
| Lipidomics: fibroblast and plasma        | Vaz 2019       | Yes                                       | Yes (plasma PC etherphospholipids)                | No  | N/A | No  | N/A                                            | No                                                          | N/A |
| Glycosylceramide profile                 | Kloth 2020     | No                                        | Increased compared to reference values            | No  | N/A | No  | N/A                                            | No                                                          | N/A |
| Neurofilament heavy chain: CSF and serum | Simonini 2021  | No (but differentiated from ALS and UMNP) | N/A                                               | No  | N/A | No  | N/A                                            | Progression rate and total ALSFRS-R score (for whole group) | Yes |

|                                             |                       |     |     |     |     |     |                  |                                                                                            |     |
|---------------------------------------------|-----------------------|-----|-----|-----|-----|-----|------------------|--------------------------------------------------------------------------------------------|-----|
|                                             |                       |     |     |     |     |     |                  | including ALS)                                                                             |     |
|                                             | Zucchi 2018           | Yes | Yes | Yes | N/A | No  | N/A              | ALSFERS-R total score and progression rate, Ashworth scale (for whole group including ALS) | Yes |
| ATG9A ratio                                 | Ebrahimi-Fakhari 2021 | Yes | Yes | No  | N/A | No  | N/A              | No                                                                                         | N/A |
| CSF A beta 1-42, total tau, phosho tau      | Rattay 2022           | Yes | No  | No  | N/A | No  | N/A              | No                                                                                         | N/A |
| mtDNA levels; Muscle biopsy                 | DelaCasa-Fages 2019   | Yes | Yes | No  | N/A | No  | N/A              | Age of onset, degree of spasticity, disability scale                                       | No  |
| Cell morphometry                            | Wali 2021             | Yes | Yes | No  | N/A | Yes | Yes (SPAST only) | No                                                                                         | N/A |
| Scanning electron microscopy of hair shafts | Rattay 2019           | Yes | Yes | No  | N/A | No  | N/A              | No                                                                                         | N/A |
| <b>Imaging</b>                              |                       |     |     |     |     |     |                  |                                                                                            |     |
| MRI brain and spine,                        | Chrestian 2016,       | No  | N/A | No  | N/A | No  | N/A              | SPRS                                                                                       | Yes |



|                                                                                                                   |                           |     |                                                                                       |     |     |     |     |                                        |     |
|-------------------------------------------------------------------------------------------------------------------|---------------------------|-----|---------------------------------------------------------------------------------------|-----|-----|-----|-----|----------------------------------------|-----|
| volumetry<br>with neural<br>network<br>analysis,<br>automated<br>segmentatio<br>n of<br>subcortical<br>structures | DelaCasa-<br>Fages 2019   | No  | N/A                                                                                   | No  | N/A | No  | N/A | No                                     | N/A |
|                                                                                                                   | Ebrahimi-<br>Fakhari 2021 | Yes | N/A                                                                                   | No  | N/A | No  | N/A |                                        |     |
|                                                                                                                   | Faber 2018                | Yes | Yes (cortical<br>thickness,<br>deep gray<br>matter<br>volume,<br>spinal cord<br>area) | Yes | N/A | No  | N/A | ACE-R, SPRS,<br>disease<br>duration    | Yes |
|                                                                                                                   | Lin 2021                  | Yes | Yes (spinal<br>cord area)<br>No (cerebral<br>atrophy)                                 | No  | N/A | No  | N/A | CSF Nf, 27-<br>OHC                     | No  |
|                                                                                                                   | Marelli 2018              | Yes | N/A                                                                                   | Yes | N/A | Yes | N/A | No                                     | N/A |
|                                                                                                                   | Martinuzzi<br>2016        | No  | N/A                                                                                   | No  | N/A | No  | N/A | No                                     | N/A |
|                                                                                                                   | Montanaro<br>2020         | Yes | Yes (right<br>prefrontal<br>cortex & B/L<br>thalami vol)                              | Yes | No  | No  | N/A | SPRS, disease<br>duration              | No  |
|                                                                                                                   | Navas-Sanchez<br>2021     | Yes | Yes (thalamic<br>atrophy)                                                             | No  | N/A | No  | N/A | SPRS<br>Disease<br>duration            | Yes |
|                                                                                                                   | Orsucci 2014              | No  | N/A                                                                                   | No  | N/A | No  | N/A | No                                     | N/A |
|                                                                                                                   | Prestsaeter<br>2020       | No  | N/A                                                                                   | No  | N/A | No  | N/A | No                                     | N/A |
|                                                                                                                   | Rattay 2019               | No  | N/A                                                                                   | No  | N/A | No  | N/A | No                                     | N/A |
|                                                                                                                   | Rattay 2022               | Yes | Yes                                                                                   | No  | N/A | No  | N/A | No                                     | N/A |
|                                                                                                                   | Rezende 2015              | Yes | No (cortical<br>thickness)                                                            | No  | N/A | No  | N/A | DTI (FA R<br>CST, spinal<br>cord area) | Yes |

|                 |                          |     |                           |     |                                        |    |     |                                                       |                                  |
|-----------------|--------------------------|-----|---------------------------|-----|----------------------------------------|----|-----|-------------------------------------------------------|----------------------------------|
|                 |                          |     | Yes (spinal cord atrophy) |     |                                        |    |     |                                                       |                                  |
|                 | Sarret 2016              | No  | N/A                       | Yes | Yes (atrophy score, cerebellar volume) | No | N/A | No                                                    | N/A                              |
|                 | Schuurs-Hoeijmakers 2012 | No  | N/A                       | No  | N/A                                    | No | N/A | No                                                    | N/A                              |
|                 | Simonini 2021            | No  | N/A                       | Yes | N/A                                    | No | N/A | No                                                    | N/A                              |
| DTI             | Aghakhanyan 2014         | Yes | Yes(FA, MD, RD)           | No  | N/A                                    | No | N/A | No                                                    | N/A                              |
|                 | Faber 2018               | Yes | Yes (FA, MD, AD, RD)      | Yes | N/A                                    | No | N/A | ACE-R                                                 | Yes                              |
|                 | Martinuzzi 2016          | Yes | Yes                       | No  | N/A                                    | No | N/A | SPRS                                                  | Yes                              |
|                 | Mishra 2015              | Yes | Yes (lower FA)            | No  | N/A                                    | No | N/A | GMFCS                                                 | Yes for DTFA in 1 section of CST |
|                 | Montanaro 2020           | Yes | Yes                       | Yes | Yes                                    | No | N/A | SPRS                                                  | No                               |
|                 | Rezende 2015             | Yes | Yes                       | No  | N/A                                    | No | N/A | SPRS (TBSS but not tractography )<br>Spinal cord area | Yes                              |
|                 | Unrath 2010              | Yes | Yes                       | No  | N/A                                    | No | N/A | No                                                    | N/A                              |
| MR spectroscopy | Erichsen 2009            | Yes | Yes (Cho/Cr ratio)        | No  | N/A                                    | No | N/A | CVLT                                                  | Yes (Cho/Cr ratio)               |
|                 | Martinuzzi 2016          | Yes | No                        | No  | N/A                                    | No | N/A | No                                                    | N/A                              |

|                        |                          |                         |                                                                         |     |     |     |     |                                       |                                                                   |
|------------------------|--------------------------|-------------------------|-------------------------------------------------------------------------|-----|-----|-----|-----|---------------------------------------|-------------------------------------------------------------------|
|                        | Montanaro 2020           | Yes                     | Yes                                                                     | Yes | No  | No  | N/A | No                                    | N/A                                                               |
|                        | Schuurs-Hoeijmakers 2012 | No                      | N/A (abnormal lipid peak in basal ganglia and thalamus in 5/5 patients) | No  | N/A | No  | N/A | No                                    | N/A                                                               |
| Ioflupane SPECT        | DelaCasa-Fages 2019      | No                      | N/A (abnormal in 2/3 patients)                                          | No  | N/A | No  | N/A | No                                    | N/A                                                               |
| <b>Neurophysiology</b> |                          |                         |                                                                         |     |     |     |     |                                       |                                                                   |
| MEPs                   | Antczak 2019             | No                      | N/A                                                                     | No  | N/A | Yes | No  | Strength post-rTMS                    | Lower MT correlated with bigger improvement in strength with rTMS |
|                        | Ardolino 2021            | No                      | N/A                                                                     | No  | N/A | Yes | No  | No                                    | N/A                                                               |
|                        | Brighente 2021           | Yes                     | Yes                                                                     | No  | N/A | No  | N/A | Age, disease duration, SPRS           | No                                                                |
|                        | Karle 2013               | No (used normal values) | N/A                                                                     | No  | N/A | No  | N/A | SPRS                                  | Yes (UL and LL CMCT)                                              |
|                        | Lassmann 2022            | Yes                     | No                                                                      | No  | N/A | No  | N/A | Gait parameters (leg RoM, foot angle) | Yes                                                               |
|                        | Martinuzzi 2016          | No                      | N/A                                                                     | No  | N/A | No  | N/A | No                                    | N/A                                                               |

|                  |                                   |                |     |               |     |     |     |      |                               |
|------------------|-----------------------------------|----------------|-----|---------------|-----|-----|-----|------|-------------------------------|
|                  | Musacchio 2018                    | No             | N/A | Yes           | N/A | No  | N/A | No   | N/A                           |
|                  | Rattay 2019                       | No             | N/A | No            | N/A | No  | N/A | No   | N/A                           |
|                  | Scheuer 2007                      | No             | N/A | No            | N/A | Yes | No  | No   | N/A                           |
|                  | Simonini 2021                     | No             | N/A | Yes           | N/A | No  | N/A | No   | N/A                           |
| NCS/EMG          | Ardolino 2021 (H-reflex, F-waves) | No             | N/A | No            | N/A | Yes | No  | No   | N/A                           |
|                  | DelaCasa-Fages 2019               | No             | N/A | No            | N/A | No  | N/A | No   | N/A                           |
|                  | Faber 2018                        | Yes            | N/A | Yes           | N/A | No  | N/A | No   | N/A                           |
|                  | Karle 2013                        | No             | N/A | No            | N/A | No  | N/A | CMCT | Yes (NCV and F wave latency)  |
|                  | Martinuzzi 2016                   | No             | N/A | No            | N/A | No  | N/A | No   | N/A                           |
|                  | Musacchio 2018                    | No             | N/A | Yes           | N/A | No  | N/A | No   | N/A                           |
|                  | Prestsaeter 2020                  | No             | N/A | No            | N/A | No  | N/A | No   | N/A                           |
|                  | Rattay 2019                       | No             | N/A | No            | N/A | No  | N/A | No   | N/A                           |
|                  | Rattay 2022                       | Yes            | No  | No            | N/A | No  | N/A | No   | N/A                           |
|                  | SSEP                              | Brighente 2021 | Yes | Yes (LL only) | No  | N/A | No  | N/A  | Age, disease duration<br>SPRS |
| Karle 2013       |                                   | No             | N/A | No            | N/A | No  | N/A | No   | N/A                           |
| Martinuzzi 2016  |                                   | No             | N/A | No            | N/A | No  | N/A | No   | N/A                           |
| Prestsaeter 2020 |                                   | No             | N/A | No            | N/A | No  | N/A | No   | N/A                           |
| Rattay 2019      |                                   | No             | N/A | No            | N/A | No  | N/A | No   | N/A                           |

|                                     |                      |                    |                                                                                 |    |     |     |                                                                     |                           |                     |
|-------------------------------------|----------------------|--------------------|---------------------------------------------------------------------------------|----|-----|-----|---------------------------------------------------------------------|---------------------------|---------------------|
| VEP                                 | Prestsaeter 2020     | No                 | N/A                                                                             | No | N/A | No  | N/A                                                                 | No                        | N/A                 |
|                                     | Rattay 2019          | No                 | N/A                                                                             | No | N/A | No  | N/A                                                                 | No                        | N/A                 |
| BAEP                                | Prestsaeter 2020     | No                 | N/A                                                                             | No | N/A | No  | N/A                                                                 | No                        | N/A                 |
| <b>Other biomarkers</b>             |                      |                    |                                                                                 |    |     |     |                                                                     |                           |                     |
| Laboratory and mobile gait analysis | Adair 2016           | No (normal values) | Yes (abnormal Gait Profile Score and Gait variable scores)                      | No | N/A | No  | N/A                                                                 | No                        | N/A                 |
|                                     | Bonnefoy-Mazure 2013 | Yes                | Yes (normalized gait velocity, lower limb, thorax, pelvis and spine kinematics) | No | N/A | No  | N/A                                                                 | No                        | N/A                 |
|                                     | Henderson 2019       | No                 | N/A                                                                             | No | N/A | Yes | No                                                                  | No                        | N/A                 |
|                                     | Lith 2019            | No                 | N/A                                                                             | No | N/A | Yes | Yes (comfortable gait speed)<br>No (Gait width, maximal gait speed) | No                        | N/A                 |
|                                     | Lassman 2022         | Yes                | Yes                                                                             | No | N/A | No  | N/A                                                                 | SPRS, serum NfL, MEP CMCT | Yes<br>No (CSF NfL) |
|                                     | Pointon 2022         | No                 | N/A                                                                             | No | N/A | Yes | No                                                                  | No                        | N/A                 |

|                                     |                   |                                  |                                                                                                    |                            |                                                                       |     |                                                                                                              |                        |     |
|-------------------------------------|-------------------|----------------------------------|----------------------------------------------------------------------------------------------------|----------------------------|-----------------------------------------------------------------------|-----|--------------------------------------------------------------------------------------------------------------|------------------------|-----|
|                                     | Regensburger 2022 | Yes                              | Yes                                                                                                | Yes                        | Yes for stride time, stance time and swing duration in cHSP subgroup. | No  | N/A                                                                                                          | SPRS, SF-12 PCS, FES-I | Yes |
|                                     | Zhang 2014        | Yes (historical)                 | Generally no but yes for some parameters (e.g. abnormal hip extension, increased hip int rotation) | No                         | N/A                                                                   | Yes | Yes for walking speed, hip rot, knee rot, but no for cadence, step length/time, hip, knee, ankle F/E, Abd/Ad | No                     | N/A |
| SD-OCT<br>Retinal nerve fibre layer | Klebe 2012        | No                               | N/A (optic atrophy present in 10/10 patients examined)                                             | No                         | N/A                                                                   | No  | N/A                                                                                                          | No                     | N/A |
|                                     | Musacchio 2018    | No                               | N/A                                                                                                | Yes                        | N/A                                                                   | No  | N/A                                                                                                          | No                     | N/A |
|                                     | Prestsaeter 2020  | No                               | N/A                                                                                                | No                         | N/A                                                                   | No  | N/A                                                                                                          | No                     | N/A |
|                                     | Vavla 2019        | No (historical normative values) | Statistically significant reduction of RNFL thickness in                                           | Yes (subgroup of patients) | No (avg F/U 10.7 months)                                              | No  | N/A                                                                                                          | SPRS                   | No  |

|                                                              |                  |     |                                                              |     |     |     |                                                 |           |     |
|--------------------------------------------------------------|------------------|-----|--------------------------------------------------------------|-----|-----|-----|-------------------------------------------------|-----------|-----|
|                                                              |                  |     | SUP, INF,<br>NAS)                                            |     |     |     |                                                 |           |     |
| Video-oculography and rotational chair testing               | Milenkovic 2019  | Yes | Yes (mean peak velocity vertical saccades)                   | No  | N/A | No  | N/A                                             | No        | N/A |
| RoM using goniometer                                         | Braschinsky 2009 | No  | N/A                                                          | No  | N/A | No  | N/A                                             | 10MWT MAS | Yes |
|                                                              | Lith 2019        | No  | N/A                                                          | No  | N/A | Yes | Yes                                             | No        | N/A |
| Instrumented dynamic balance assessment                      | Lith 2019        | No  | N/A                                                          | No  | N/A | Yes | Yes (known direction)<br>No (unknown direction) | No        | N/A |
| Urodynamic assessment                                        | Joussain 2019    | No  | N/A (majority had neurogenic detrusor overactivity)          | No  | N/A | No  | N/A                                             | No        | N/A |
| Video supported posturography                                | Musacchio 2018   | No  | N/A                                                          | Yes | N/A | No  | N/A                                             | No        | N/A |
| Protocol for Evaluation of Acquired Speech Disorders (PADAF) | Olchik 2021      | Yes | Yes (abnormal resonance, phonation, breathing, articulation) | No  | N/A | No  | N/A                                             | No        | No  |
