# Supplementary material for: Outcome Measures and Biomarkers for Clinical Trials in Hereditary Spastic Paraplegia: A Scoping Review
Source: Genes (Basel). 2023 Sep 3;14(9):1756. doi: 10.3390/genes14091756 (PMC10530989; doi:10.3390/genes14091756)
Supplement: Supplementary file 1 [file genes-14-01756-s001.zip › Siow et al Supplementary Material S1.xlsx]

## Sheet: List of HSP scoping review stud
Study ID	Country	Aim of study	Study design	Longitudinal study	Number of participants with HSP	Particpant genotype	Control group	Age	Participant age (years)	Intervention	Type Outcome 1 (if too many, can refer to paper for details)	Type Outcome 2	Type Outcome 3	Type Outcome 4	Type Outcome 5	Type Outcome 6	Type Outcome 7	Type Outcome 8	Type Outcome 9	Type Outcome 10	Type Outcome 11	Type Outcome 12
Adair 2016	Australia	Exploratory observational study to quantify gait kinematics at the trunk and pelvis of children with HSP	Cross sectional study	No	11	1 SPG3A, 1 SPG4, rest unknown	No (Normal values used)	11	median 11		Gait analysis
Aghakhanyan 2014	Italy	To investigate WM alterations across the whole brain in a group of patients with pHSP with SPG4, SPG5, SPG3a and SPG10 mutations, applying tract-based spatial statistics analysis with multiple DTI indices.	Cross sectional study	No	12	SPG4, SPG5, SPG3A, SPG10	Yes	49.2	mean 49.2 SD 8.1		MRI and DTI processing
Antczak 2019	Poland	To investigate the therapeutic potential of bilateral, high-frequency rTMS over primary motor areas for muscles of lower extremitites in various forms of HSP (pure, complicated, AMN). RCT, crossover design. First study using rTMS for therapeutic purposes in HSP.	Randomised controlled trial	No	14	1 SPG3A, 1 SPG7, 3 AMN, 3 AMN carrier, 7 unknown	No	33.8	Mean 44.8 SD 10.1	rTMS and sham rTMS(coil rotated posteriorly by 90 degrees which reduces magnetic field by 67-73%, making it devoid of biologic effect); 5 stimulating sessions, 1 a day, during consecutive working days. 1500 magnetic stimuli on each side (10Hz in trains lasting 7.5 secs, 40 trains per side per session). Daily rTMS for five consecutive working days. Magstim Rapid stimulator with 110mm double cone c…	10 metre walk test (10MWT)	MEP measures	Timed up and Go	Strength measured with microFET 2 hand-held dynanomometer	Modified Ashworth Scale
Ardolino 2021	Italy	Double-blind, randomised crossover and sham-controlled study to evaluate the effects of tsDCS on spasticity in patients with HSP	Randomised controlled trial	No	11	8 SPG4, 1 SPG3A, 1 SPG7, 1 SPG 15	No	37.3	mean 37.3 SD 8.1	tsDCS and sham tsDCS - Each session lasted 5 days a week (20min twice a day), 2.0mA, 20min, via programable stimulator HDCStim, one electrode on spinous process T10 and another above R shoulder. Every pt recevied both anodal and sham session in cross-over design (AS or SA assigned in alternating allocation). Each session at least 3 months apart. Sham current turned on for five seconds then turned…	Ashworth Scale	5 Minutes Walking test (5MWT)	MEPs	H-reflex	F-waves	SPRS
Bastani 2021	Iran	To study the effectiveness of rTMS as palliative measure for lower limb spasticity, function and gait improvement in patients with HSP	Randomised controlled trial	No	8	unknown	No	38.5	mean 38.5, SD 5.4	rTMS and sham rTMS - 5 sessions rTMS on 5 consecutive days in a week. Coil on vertex, 5 trains of stim lasting 1 min with freq 5 Hz. 2 minute break between trains. Amp of stim at 90%rMT at hot spot. Sham coil placed perpendicular to scalp, otherwise same as treatment group	modified Ashworth scale	lower extremity subclass of Fugl-Meyer assessment. 5 subcategories for evaluation. higher scores indicate higher function.	10MWT	SF-36 (persian trnaslation)
Bertolucci 2015	Italy	To test the effectiveness of a robotic-aided intensive program of gait training on balance, walking ability and quality of life in adult subjects affected by uncomplicated HSP.	Non-randomised experimental study (including interventional studies)	No	13	5 SPG4, 6 SPG7, 1 SPG11,1 SPG5	No	46.3	mean 46.3 SD 8.9	Rehabilitative treatment (Lokomat - robotic gait orthosis): 3 weekly session for 6 weeks. Using maximum assistance of robot on both legs, max comfortable speed for patient and 40% body weight support. Then according to muscle tone and gait quality monitored by visual feedback by the machine, therapist gradually reduced guidance force on both legs, without dropping below 75%. Exercises modified in…	Berg Balance Scale	Timed up and go test (TUG)	10-Metre Walking Test (10MWT)	Six-minute walk test (6MWT)	Physiological Cost Index (PCI)	SF36	HADS	Modified Ashworth Scale
Bonnefoy-Mazure 2013	Switzerland	To compare full-body movements of HSP and SP groups and in particular the movement of upper limbs	Cross sectional study	No	10	unknown	Yes	16.7	mean 16.7 SD 5.8		Computer gait analysis
Braschinsky 2009	Estonia	To characterise the spasticity and RoM in patients with HSP and to correlate these parameters with walking speed. Observational population based cohort study.	Cross sectional study	No	46	9 SPG4, the rest unknown	No	50.1	Mean 50.1		Active and passive RoM of hip flexion, hip abduction and foot dorsiflexion	Modified ashworth scale	10 metre walk test
Braschinsky 2011	Estonia	To examine the relative effect of HSP on HrQoL	Cross sectional study	No	49	unknown	Yes		mean N/A		RAND 36-item Health Survey 1.0 in Estonian
Brighente 2021	Brazil	To evaluate the role of evoked potentials (EPs) as disease biomarkers of HSPs	Case control study	No	18	12 SPG4, 3 SPG5, 1 SPG7, 1 SPG11, 1 CTX	Yes	39.7	Mean 39.7 SD 18.7		MEPs	SSEPs	SPRS
Chrestian 2016	Canada	To describe the clinical. genetic and epidemiologic features of HSP in Canada, to determine which clinical, radiologic and genetic factors determine functional outcomes	Cross sectional study	No	150	72 SPG4, 24 ATL1, 12 SPG11, 10 SPG7, 8 KIAA0196, 5 PLP1, 5 SLC2A1, 4 CYP7B1, 3 VAMP1, 2 ALS2, 1 KIF5A, 1 SLC16A2, 1 ZFYVE26, 1 FA2H, 1 PNPLA6	No	39.2	Mean 39.2 SD 22.1		SPATAX-EUROSPA disability score	SPRS	MRI brain
Coutelier 2015	France	Report of 7 families with ALDH18A1 mutations segregating in recessive or dominant inheritance associated with abnormal plasma amino acid levels	Case series	No	21	15 dominant SPG9, 6 recessive SPG9	No	43.84	Mean 43.84 - 50.87yo		Plasma amino acid profile
Cubillos-Arcila 2022	Brazil	To investigate the progression of functional gait in individuals with HSP and to define sensitivity to change, minimal clinically important difference and validity of timed functional test of gait. Searching for best outcome measures for future clinical trials.	Cross-sectional and prospective cohort study	Yes	25	17 SPG4, 4 SPG5, 2 SPG7, 2 SPG3A	Yes	51	Mean 51		SPRS	10MWT	TUG	6MWT
DelaCasa-Fages 2019	Spain	To characterise SPG7: genetic testing of patienst with suspected HSP	Case series	No	35	SPG7	Yes (for mtDNA only)	53	Mean 53 SD 11.3		SPRS, SARA, SPATAX-EUROSPA disability score	MRI brain	Neurophysiology	Muscle biopsy	mtDNA levels	Ioflupane SPECT
deLima 2021	Brazil	To evaluate the efficacy and safety of BoNT-A in the treatment of lower limb spasticity in patients with HSP.	Randomised controlled trial	No	55	21 SPG4, 4 SPG8, 2 SPG3A, 2 SPG11, 2 SPG33, 3 SPG72, 1 SPG6, 1 SPG7, 1 SPG15, 1 SPG28, 1 SPG48, 1 PLA2G6, 1 X-linked adrenoleukodystrophy, 1 autosomal-recessive spastic ataxia of Charlevoix-Saguenay, 13 unknown	No (placebo group)	43	mean 43 SD13.4	BoNT-A IM, placebo IM (0.9% sodium chloride solution) - Single treatment with 8wk follow up. Crossover with 24-28 weeks washout. Total dose 400 units: 100 units in each adductor magnus and 100 units in each triceps surae (divided in 3 parts: 1/4 in the head of each gastrocnemius and 1/2 in the soleus)	10MWT	Gait at self-selected velocity with 10MWT performed once	SPRS	Adductiors and triceps surae changes in muscle tone and strength (MAS, MRC)	Brief Pain Inventory	Modified Fatigue Impact Scale	Subjective perception of symtpoms, or benefit, or gait improvement
DuMontcel 2008	France	To evaluate quantitative tests of cerebellar function including assessment of their specificity; to find correlations with clinical signs; and to develop a composite functional score.	Cross sectional study	No	53	22 SPG4, 4 SPG3, 27 unknown	Yes	47.4	Mean 47.4 SD 13.4		SARA	Unified Huntingtonâ€™s Disease Rating Scale (UHDRS part IV)	Health-related quality of life (EQ-5D)	Patient health questionnaire (PHQ-9)	Writing test	Dysdiadochokinesis testing (Tapping test)	Nine-hole pegboard test	Click test	Lower limb score (time-restricted walking test)	Composite cerebellar functional severity (CCFS) score
DuMontcel 2012	France	To evaluate disease progression and determine validity of clinical tools for therapeutic trials.	Cohort study	Yes	64	31 SPG4, 4 SPG3, 29 Unknown	No	45	mean 45-50 SD 14		CCFSw	SARA	AMBUS
Ebrahimi-Fakhari 2021	USA	To validate a high-throughput ATG9A translocation assay in patient-derived fibroblasts as a diagnostic marker of AP-4-HSP.	Diagnostic test accuracy study	No	20	9 AP4B1, 4 AP4M1, 5 APS1, 2 AP4B1 VUS	Yes	8.65	Mean 8.65		ATG9A ratio	Clinical features	MRI features
Erichsen 2009	Norway	To investigate whether SPG4-HSP leads to neuronal biochemical changes detectable on proton magnetic resonance spectroscopy (MRS).	Cross sectional study	No	18	SPG4	Yes	48.4	Mean 48.4 SD 7		MR spectroscopy	Cognitive assessment
Faber 2018	Brazil	To characterise genetic and clinical features, including motor and cognitive manifestations, in a group of patients with SPG11, and to undertake neuroimaging studies in this group, to allow correlation of clinical findings with MRI/anatomic abnormalities.	Cohort study	Yes	25	SPG11	Yes	29	Mean 29		MRI	Addenbrooke's Cognitive Examination Revised (ACE-R)	Spastic Paraplegia Rating Scale (SPRS)	Neurophysiological assessment (NCS and EMG)
Gassner 2021	Germany	To correlate functional gait measures with self-rating questionnaires for fear of falling and QoL, and against the SPRS.	Cross sectional study	No	22	11 SPG4, 2 SPG5, 1 SPG31, 8 Undetermined	Yes	52.2	Mean 52.2 SD 10		Spastic Paraplegia Rating Scale (SPRS)	Falls Efficacy Scale-International (FES-I)	ZUNG depression score	SF-12 (QoL score)	MoCA	Functional gait assessment (3 tests undertaken: 10m walk test, Timed up and go test (TUG), 2 min walking test)
Geva-Dayan 2010	Israel	To report outcomes and experience with use of botulinum toxin type A injections to the lower limbs of children with HSP.	Case series (Retrospective review)	No	12	1 SPG4, 1 ALS2, 10 Unknown	No	4.8	Mean 4.8 SD 2.5	Botulinum toxin A. The mean interval between repeated injections was 13.2 +/- 11.0 months with the shortest duration being 3 months and the longest 3 years. The time between the first and last injections varied between patients with mean 2.8 +/- 1.8 years. Dysport was administered to 10 children and Botox to 2 children. Reevaluation of muscle tone (Ashworth Scale) and muscle function (Gross Motor…	Modified Ashworh Scale	Gross Motor Function Measure (GMFM-88)
Growdon 1991	USA	To assess the clinical effect of L-threonine in patients with HSP.	Randomised controlled trial	No	18	unknown	No	47.5	Mean 47.5	L-threonine vs placebo cross-over trial. Cross-over study with 2x treatment periods lasting 2 weeks each, an intervening 2-week washout period and a final testing period 2 weeks after completion of treatment period 2 (i.e. 8 weeks in total). Patients received L-threonine at either a dose of 1.5g TDS (total daily dose 4.5g) or 2g TDS (6g total dose). 7 patients received the 4.5g dose, 9 took the 6…	Motor function and spasticity scores	Amino acid analysis in blood and CSF
Henderson 2019	UK	To evaluate efficacy of gait corrective surgery for paediatric patients with HSP.	Case series	No	9	unknown	No		N/A	Gait correction surgery	Gait evaluation	Functional questionnaire score
Jordan 2021	USA	To establish a metric for health-related quality of life (HRQoL) in patients with AP-4-HSP, and investigate correlations with major symptoms and disease severity.	Cross sectional study	No	64	31 SPG47 (AP4B1), 21 SPG50 (AP4M1), 2 SPG51 (AP4E1), 10 SPG52 (AP4S1)	No	12.45	mean 12.45 SD 10.53		Caregiver Priorities and Child Health Index of Life with Disabilities (CPCHILD) questionnaire	Spastic Para-plegia Rating Scale (SPRS) total and spasticity subscores	4-stage functional mobility scale (4FMS)
Joussain 2019	France	To characterise clinical and urodynamic aspects of LUTS encountered in HSP, to describe urological complications and therapeutic strategies.	Cohort study	Yes	33	unknown	No	62	Mean 62 SD 14		Lower urinary tract symptoms (LUTS), bowel or sexual dysfunction	Urodynamic assessment
Kai 2014	China	To assess the effect of selective dorsal rhizotomy (SDR) as a treatment for patients with severe pure HSP.	Non-randomised experimental study (including interventional studies)	Yes	4	unknown	No	31.25	mean 31.25	Selective dorsal rhizotomy (SDR) -Operation completed in May-October 2009 with follow up range 25-30 months. A T12-L1 laminectomy was performed. Rootlets from L2-S2 dorsal roots were were sectioned based on pre-defined lesioning criteria, evaluated by stimulation-evoked responses (with intraoperative electromyography). Nerve rootlets were considered to be involved in the spastic process if the re…	Ashworth score	Spasm frequency scale
Karle 2013	Germany	To evaluate clinical, and motor and sensory electrophysiological features in patients with HSP.	Cross sectional study	No	128	1 SPG3, 35 SPG4, 3 SPG5, 3 SPG7, 1 SPG8, 1 SPG10, 6 SPG11, 4 SPG15, 74 unknown	No (Normal values used)	47.5	Mean 47.5 SD 14.9		SPRS	Clinical diagnosis of motor or sensory peripheral neuropathy	MEPs	Nerve conduction studies	SSEPs
Kessler 2021	Germany	To evaluate CSF neurofilament light chain (cNfL) levels in patients with HSP and provide information on the influence of demographic factors.	Cross sectional study	No	59	17 SPG5, 10 SPG4, 1 SPG3, 1 SPG6, 1 SPG11, 1 SPG30, 1 SPG35, 1 SPG46	Yes	43.8	Mean 43.8		CSF neurofilament light chain (cNfL)
Kessler 2022	Germany	To investigate serum neurofilament light chain (sNfL) as a potential therapy response, diagnostic, monitoring, and prognostic biomarker in SPG4.	Cohort study	Yes	93	SPG4	Yes	50.9	Mean 50.9		sNfL	cNfL	SPRS	SPATAX disability scale
Klebe 2012	France	Studied 134 patients with HSP with SPG7 analysis to define the clinical and mutation spectrum of SPG7 and to propose guidelines for when to test for SPG7 in patients with HSP and autosomal dominant optic neuropathy	Cross sectional study	No	28	SPG7	Yes	42.5	Mean 42.5, SD 18.3		Clinical features in HSP-SPG7 patients	Ophthalmologic assessment including OCT	Clinical features in AD ON family (carrying the SPG7 Asp411Ala variant)
Klimpe 2012	Germany	To assess the correlation of HRQoL with disease severity and clinical features in patients with HSP.	Cross sectional study	No	143	47 SPG4, rest unknown	No	47.8	Mean 47.8 SD 13		Short-Form 36 (SF-36)	Spastic Paraplegia Rating Scale (SPRS)	Walking ability (landmarks of disability)
Kloth 2020	Germany	To report clinical/genetic/imaging findings in 2 siblings with SPG46	Case series	No	2	SPG46	Yes	44.5	mean 44.5		Glycosylsphingosine (lyso-Gb1)	Glycosylceramide profile
Lassmann 2022	Germany	To characterise prodromal SPG4-related gait changes in prodromal and mild-to-moderate manifest SPG4 patients	Cross sectional study	No	17 SPG4 (30 prodromal SPG4)	SPG4	Yes	48.2	mean 48.2, SD 8.2		Instrumented gait analysis using an infrared-camera-based motion capture system (VICON FX)	SPRS	Serum neurofilament light chain	CSF neurofilament light chain	Motor-evoked potentials of leg
Lin 2021	China	To identify potential clinical, CSF or MRI biomarkers that could be used to assess therapeutic efficacy in SPG5.	Cross sectional study	No	34	SPG5	Yes	30	Median 30		SPRS	Spinal cord atrophy on 3T MRI	Brain atrophy on 3T MRI	CSF 27-hydroxycholesterol	CSF neurofilament light	MMSE
Lith 2019	Netherlands	To investigate the functional effects of bilateral botulinum toxin A treatment and subsequent stretching of spastic hip adductors on gait and reactive lateral stepping responses in patients with pure hereditary spastic paraplegia	Non-randomised experimental study (including interventional studies)	No	25	12 SPG4, 2 SPG10, 1 SPG17, 2 SPG31, 8 unconfirmed dominant HSP	No	53.5	Mean 53.5	Botulinum toxin followed by 16 weeks of stretching exercises. Botulinum toxin type A (Xeomin) into hip adductors (gracilis, adductor magnus, adductor longus) - 100 units diluted in 5mL of 0.9% saline - dose depended on MAS: 150 units for MAS 1, 200 units for MAS >= 2 - distribution across gracilis/adductor magnus/adductor longus predefined (see Table II in pdf) Followed by stretching exercises of…	Instrumented gait analysis	Instrumented dynamic balance assessment	Muscle strength (MRC grading) of hip adductors and abductors	Modified Ashworth (MAS)	Passive ROM of hip abduction using goniometer	Berg Balance Scale	Timed up and go (TUG)	6MWT	Activities-specific Balance Confidence (ABC) scale
Loureiro 2013	Portugal	To describe the clinical, genetic, and epidemiological features of Portuguese AD-HSP families	Cross sectional study	No	239	27 families with SPG4, 5 families with SPG3, 1 family with SPG31, 9 unknown	No	50.7	Mean 50.7, SD 17.9		Motor severity and rate of disease progression	Modified Ashworth Scale	Muscle strength using MRC
Marelli 2018	France	1) To validate plasma 25-OHC,27-OHC and their ratio to total cholesterol as diagnostic biomarkers for SPG5 2) To test whether candidate molecules (atorvastatin, CDCA, resveratrol) can lower plasma oxysterols and improve serum bile acids profile	Non-randomised experimental study (including interventional studies)	Yes	21	SPG5	Yes	49.5	mean 49.5, SD 14	Atorvastatin 20mg BD CDCA 500mg BD (intervention 2) Resveratrol 40mg BD (intervention 3) Three-period of 2 months, three-treatment in random order, crossover (each separated by 4-month washout) = 6 sequences (with each sequence administered to 2 patients)	Fasting (12 hours) 25-OHC, 27-OHC and 24S-OHC levels + bile acid levels (in 3 patients measured at 1 yearly intervals)	MRI (historical)
Marelli 2020	France	To describe the phenotype of a three-generation family of SPG9	Case series	No	4	SPG9	No		N/A		Citrulline
Margetis 2014	Greece	To study the effectiveness and safety of intrathecal baclofen therapy for the treatment of spasticity and gait improvement in patients suffering from hereditary spastic paraplegia	Non-randomised experimental study (including interventional studies)	Yes	16	unknown	No	43	Mean 43	Intrathecal baclofen pump, Initially given at 50ug over 24 hours; then slowly uptitratde in 5-10ug increments; 2 of the 6 female patients had a negative baclofen IT bolus test dose trial so did not proceed to pump; Average follow up was 25.8 months	Modified Ashworth scale	Modified version of functional walking scale of the Gillette Functional Assessment Questionnaire
Martinuzzi 2016	Italy	Full clinical and paraclinical characterisation of large population of Italian patients with molecularly diagnosed HSP, detail how various assessment tools measure CST impairment	Cross sectional study	No	70	32 SPG4, 11 SPG11, 7 SPG3A, 7 SPG5, 4 SPG7, 3 SPG10, 3 SPG15, 1 SPG31, 2 SPG35	Yes (for DTI and MRS only)	42.97	Mean 42.97 SD 18.58		SPRS	Modified Ashworth Scale	6MWT	LL Deep Tendon Reflexes, LL Medical Research Council	WAIS-R	Functional Independence Measure (FIM)	EMG and NCS	Standard MRI	DTI and MRS	SSEP	Motor evoked responses
Milenkovic 2019	Austria	To investigate oculomotor and vestibular dysfunction in five patients with genetically verified SPG7	Case series	No	5	SPG7	Yes	58.4	mean age 58.4		Video-oculography and rotational chair testing to assess: spontaneous nystagmus, smooth pursuit, horizontal & vertical saccades, VOR
Mishra 2015	USA	To test the effectiveness of TSFA in clinical research	Cross sectional study	No	29	unknown	Yes	8.9	mean 8.9 SD 2.1		Diffusion Tensor Imaging - MRI	Gross Motor Function Classification System (GMFCS) measurement
Montanaro 2020	Italy	To investigate the role of a multimodal advanced MRI approach (DTI, VBM, MRS) in defining disease-specific alterations in HSP, in groups of HSP patients and Healthy controls, to evaluate longitudinal brain changes and identify specific anatomic involvement and types of brain modifications.	Cohort study	Yes	31	12 SPG4, 4 SPG5, 3 SPG30, 3 SPG3, 2 SPG8, 2 SPG11, 1 SPG7, SPG72, SPG10, SPG31, unknown	Yes	43.5	mean 43.5, SD 12		SPRS	MRI	Voxel based morphometry	H1-MR spectroscopy (MRS)	DTI
Musacchio 2018	Germany	To establish biological markers for the natural history and course of SPG11	Cohort study	Yes	13	SPG11	No		N/A		SPRS	NCS/EMG/MEP	Video-supported posturography	Cognitive testing	OCT
Navas-Sanchez 2021	Spain	To detect potential alterations in the volume and shape of the thalamus and various basal ganglia structures in SPG4	Cross sectional study	No	24	SPG4	Yes	46	Mean 46, SD 13		MRI with automated segmentation of the subcortical structures (thalamus, hippocampus, caudate nucleus, globus pallidus, and putamen) in native space and shape analysis of the structures	SPRS	MMSE
Olchik 2021	Brazil	To evaluate the frequency and clinical characterization of dysarthria in different types of HSP	Cross sectional study	No	66	31 SPG4, 4 SPG11, 4 SPG5, 4 CTX, 3 SPG7, 2 SPG3A	Yes		N/A		Protocol for the Evaluation of Acquired Speech Disorders (PADAF)
Orsucci 2014	Italy	To clinically and molecularly characterise a big cohort of patients with HSP in Tuscany	Retrospective cohort study	No	45	13 SPG4, 5 SPG7, 1 SPG10, 1 SPG11, 1 SPG17	No	51.2	Mean 51.2 SD 12.8		Four-stage functional scale of motor disability (4SMD)	SF-36	SPRS	MRI
Paparella 2020	Italy	To evaluate the effect of the combined BoNT-A and intensive PT in patients with HSP	Cohort study	No	18	5 SPG4, 1 SPG5, 1 SPG7, 2 SPG8, 1 SPG11, 1 SPG72, 7 unknown	No	53.9	Mean 53.9 SD 12.2	Botulinum toxin (Xeomin, Dysport and/or Botox) + physiotherapy, EMG guided toxin; dose determined for individual patients	SPRS	Walking Handicap Scale	Modified Ashworth Scale	10MWT and 2MWT	Timed up and go (TUG)	Visual analogical scale (for QOL)	Numeric rating scale (for pain)
Pointon 2022	UK	Evaluate the use of Intrathecal baclofen (ITB) on 5 ambulant children with HSP	Case series	No	5	1 SPG30, 4 unknown	No	7.2	mean 7.2	Intrathecal baclofen. Flexible dosing mode with lower rates at night (typically 25-30% lower than day rate). Several cases needed gradual increases in dose over time potentially due to the progressive nature of the disease	Gross motor function measure-66 item test (GMFM-66)	Gross motor function classification score (GMFCS) equivalent	Modified Ashworth Score (MAS)	6MWT	(Modified) Goal Attainment Scale (mGAS)	Cerebral palsy quality of life questionaire (CPQoL)	Laboratory gait analysis
Prestsaeter 2020	Norway	To characterize Norwegian patients with SPG5, including clinical examinations, genetic analyses, measurements of hydroxycholesterols, electrophysiological investigations and brain imaging	Cross sectional study	No	5	SPG5	No	49.6	Mean 49.6		Serum 25-OHC and 27-OHC	SPRS	MRI brain	OCT	NCS/EMG/SEP/BAEP/VEP
Rattay 2019	Germany	Determine the phenotypic spectrum of FAHN/SPG35, define the disease course and identify clinical and imaging biomarkers	Cohort study	No	19	SPG35	No	14	Mean 14		Neurophysiology: MEP, SEP, VEP, NCS	MRI brain including midbrain & pons atrophy on mid-sagittal section	Scanning electron microscopy of hair shafts
Rattay 2019	Germany	To evaluate non-motor symptoms in SPG4 and their relevance with regard to health-related quality of life.	Cross sectional study	No	118	SPG4	Yes	50.4	Mean 50.4 SD 9.4		EQ-5D	2014 Revised IRLSSG Diagnostic Criteria for RLS	Becks Depression Inventory (BDI-V)	Modified Fatigue Impact Scale (MFI)	Brief Pain Inventory (BPI)	Montreal cognitive assessment (MoCA)	CANTAB Cognitive Assessment Software
Rattay 2022	Germany	To characterise the prodromal phase of hereditary spastic paraplegia type 4 (SPG4) by biomarkers and clinical signs and symptoms that develop before manifest gait abnormalities.	Cohort study	No	30	SPG4	Yes	33.7	mean 33.7 SD 12		SPRS	Brief pain inventory	Beck's depression inventory	Multidimensional fatigue inventory	Montreal Cognitive Assessment	EQ-5D	3 minute walk test and pulse rates	Neurophysiology: NCS & MEP	CSF neurofilament light	Other CSF markers (Abeta1-42, total-tau, phospho-tau)	Serum neurofilament light	Brain MRI volumetry with neural network analysis
Regensburger 2022	Germany	To investigate gait cyclicity parameters by application of a mobile gait analysis system in a cross-sectional cohort of patients with HSP and a longitudinal fast progressing subcohort	Cross sectional study	Yes	112	34% SPG4, 34% SPG7, 13% SPG11, 17% no genetic diagnosis	Yes	47.7	mean 47.7 SD 15.2		Mobile gait analysis	SPRS	Timed up and go (TUG)	Falls efficacy scale internationa lquestionnaire (FES-I)	Short form 12 (SF-12)	Montreal cognitive assessment (MoCA)
Rezende 2015	Brazil	To identify regions of CNS (cerebral and spinal cord) damaged in pateints with SPG4-HSP using a multi-modal neuroimaging approach (GM and WM, Spinal cord) and to identify possible clinical correlates of damage.	Cross sectional study	No	11	SPG4	Yes	46	mean 46 SD 15		SPRS	MRI brain - cortical thickness analyses	DTI - TBSS, tractography	MRI - spinal cord morphometry
Sarret 2016	France	To analyze the natural timecourse of hypomyelinating PLP1-related disorders (Pelizaeus-Merzbacher disease [PMD] and spastic paraplegia type 2) using brain magnetic resonance imaging (MRI) motor development score (MDS) correlations.	Cohort study	Yes	35	PLP1	No	11.7	mean 11.7 SD 7.8		MRI
Scheuer 2007	Denmark	To investigate the effects of gabapentin on clinical disability and motor cortical excitability in SPG4-linked hereditary spastic paraplegia patients.	Randomised controlled trial	No	10	SPG4	No	45.4	mean 45.4	2 months gabapentin + 10 days washout + then 1 month placebo - Gabapentin started at 2400mg daily -> 4000mg daily titrated over 10 days	Visual analogue score (VAS)	Disability score (DIS)	Ambulatory score (AMB)	Self-reported severity of sphincter disturbances (urinary symptoms)	Combinations of MS Impairment Scale and SPATAX diagnostic form - paresis (hip, knee, ankle), tendon reflexes, tone	paired transcranial magnetic stimulation	Blood measurements of S-gabapentin
Schneider 2019	Germany	To characterize lower urinary tract/urological symptoms and patient satisfaction in genetic and sporadic HSP patients.	Cross sectional study	No	71	34 SPG4, rest unknown	No	55.4	mean 55.4 SD 13.9		ICIQ-SF	SCOPA-AUT	ICIQ-LUTSqol
Schols 2017	Belgium, Greece, Italy, Germany, Italy, Brazil	To perform a detailed clinical and biochemical analysis in 34 genetically confirmed SPG5 cases from 28 families, study dose-dependent neurotoxicity of oxysterols in human cortical neurons and perform a randomized placebo-controlled double blind interventional trial targeting oxysterol accumulation in serum of SPG5 patients.	Cross sectional analysis and Randomised controlled trial	Yes	34 (14 in RCT)	SPG5	Yes	40	mean 40	Atorvastatin 40mg/day 9 weeks, Placebo 9weeks. Adult dose 40mg, Child dose under 18yo: 20mg/day.	SPRS,	Serum 27-OHC	Change of 27-OHC in CSF, reduction in 24-OHC, 25-OHC and 3b-CA in serum and CSF	3-min endurance walk	physical cost index
Schuurs-Hoeijmakers 2012	Netherlands	To report on four families affected by a clinical presentation of complex hereditary spastic paraplegia (HSP) due to recessive mutations in DDHD2.	Case series	No	12	SPG54	No	11.8	mean 11.8		Thin corpus callosum	Periventricular white-matter hyperintensities	Magnetic resonance spcetroscopy - Lipid peak
Simonini 2021	Italy	To assess whether phosphorylated neurofilament heavy chain (pNfH) can discriminate different upper motor neuron (UMN) syndromes, namely, ALS, UMN-predominant ALS, primary lateral sclerosis (PLS) and hereditary spastic paraparesis (hSP) and to test the prognostic value of pNfH in UMN diseases.	Cohort study	Yes	13	6 unknown	No	51.6	mean 51.60 SD 18.84		Serum pNfH	CSF pNfH	ALS functional rating scale Revised	Brain MRI	Motor evoked potentials
Unrath 2010	Germany	To investigate three different rare MNDs (PLS, HSP, X-linked Spinobulbar Muscular Atrophy), by applying DTI to brain MRI data of patients with MNDs to analyse and quantify WM tract integrity by a whole brain-based approach and fiber tracking with the aim of producing a DTI-based definition of disease-associated patterns of microstructural WM alterations that might correlate with clinical presenta…	Cross sectional study	No	24	6 SPG4, rest unknown	Yes	50	mean 50.0 SD 9.3		Diffusion tensor imaging (DTI)
Uygunoglu 2016	Turkey	To investigate the effects of dalfampridine on hereditary spastic paraparesis.	Non-randomised experimental study (including interventional studies)	No	5	3 SPG4, 1 probable SPG4, 1 SPG15	No	35.2	mean 35.2 SD 10.8	Dalfampridine-SR 10mg BD	Modified Ashworth Scale (MAS)	10m walk time	20m walk time	9-hole peg test (NHPT)
Vavla 2019	Italy	To measure RNFL thickness with OCT in patients with HSP including longitudinal F/U in subgroup, to compare changes and correlate to disease progression. Studied as a potential biomarker.	Cohort study	Yes	23	8 SPG4, 6 SPG3a, 3 SPG72, 2 SPG5, 2 SPG7, 2 SPG8	Yes	44.6	Mean 44.6 SD 17.7		SD-OCT Exam: Retinal nerve fiber layer (RNFL) thickness	SPRS
Vaz 2019	Netherlands	To investigate the effect of PCYT2 variants on phenotype and lipid profile in human cell and mouse models.	Non-randomised experimental study (including interventional studies)	No	5	SPG82	Yes	11	mean 11yo		Lipidomics in fibroblasts and plasma
Wali 2021	Australia	To quantify cell morphological features using cell morphometry from patient fibroblasts 15 people with SPAST and SPG7 HSP and matched controls using machine learning.	Cross-sectional study	No	15	10 SPG4, 5 SPG7	Yes	51.8	mean 51.8		Cell Morphometry
Wilke 2018	Germany	To provide first proof-of-concept that serum Nfl serves as biomarker of neuronal damage and disease progression in HSP. Measured serum levels of Nfl in HSP patients, ALS patients and age-matched healthy controls with established Simo assay.	Cohort study	No	96	35 SPG4, 11 SPG7, 5 SPG11, 4 SPG5, 3 SPG3, 2 SPG15, 1 SPG10, 1 ABCD1, 1 GAN, rest unknown	Yes	51.4	Mean 51.4		Serum neurofilament light chain (NfL) level	SPRS	Cross-sectional disease progression
Zhang 2014	New Zealand	To evaluate effect of hydrotherapy treatment in individuals with late onset HSP by quantifying gait parameters in adults with HSP. Biomechanics analysis, 10-week hydrotherapy, final biomechanics. First study to report joint angles and moments in three planes for patients with HSP pre and post therapy	Non-randomised experimental study (including interventional studies)	No	9	unknown	Yes		N/A	Hydrotherapy - 10-week programme. 1 group, 5 weeks individual, group, 5 weeks individual. 45-min sessions twice per week.	Modified Ashworth Scale	Gait analysis	Cadence, step length, step time, single support (%)	Joint kinematics (range of motion)	Joint kinetics
Zucchi 2018	Italy	To test whether phosphorylated neurofilament heavy chain (pNfH) may discriminate different UMN syndromes at diagnosis and to test their prognostic role among these diseases.	Case control study	Yes	9	unknown	Yes	48	Mean 48 SD 14.77		CSF and serum pNfH	Modified Rankin Scale	ALS rating scale revised (ALSFRS-R)	Ashworth Scale
							SD	14.8614
							Mean	39.915
